# Supplementary material for: GTPase-activating protein Rasal1 associates with ZAP-70 of the TCR and negatively regulates T-cell tumor immunity
Source: PubMed Central journal article supplement (PMC6805919; doi:10.1038/s41467-019-12544-4), 2019-10-22
Supplement: 41467_2019_12544_MOESM1_ESM.pdf [file 41467_2019_12544_MOESM1_ESM.pdf]

## Supplementary Figures

Thaker et al (2019)

SFigure 1

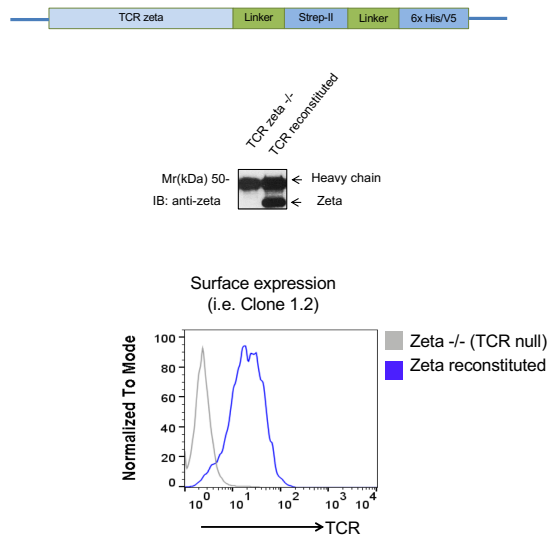

**SFigure 1: Tandem affinity purification (TAP) from reconstituted TCR-null zeta<sup>-/-</sup> 3A9 cells.** Upper panel: structure of TAP zeta chain construct with tandem Step-II and His/V5 tags for purification. Middle panel: presence of the TAP zeta chain in constituted TCR-null zeta<sup>-/-</sup> 3A9 cells. Lower panel: flow cytometry showing the surface expression of the TCR complex on TCR-null zeta<sup>-/-</sup> 3A9 cells transfected to express TAP zeta complex.

SFigure 2

| EXPERIMENT 1            |                                                                                                  |                       |                |              |                 |              |              |                  |                  |
|-------------------------|--------------------------------------------------------------------------------------------------|-----------------------|----------------|--------------|-----------------|--------------|--------------|------------------|------------------|
| Protein Accession       | Protein Description                                                                              | Protein Masscot Score | Protein Expect | Protein Mass | Protein Matches | Protein Rank | Peptide Rank | Peptide sequence | Peptide sequence |
| sp P24161-1 CD32_MOUSE  | Isolform CD-3 zeta of T-cell surface glycoprotein CD3 zeta chain OS=Mus musculus GN=CD327        | 675                   | 1.00E-63       | 18780        | 45              | 1            | 1            | EDVDLTK          | EDVDLTK          |
| sp P24161-1 CD92_MOUSE  | Isolform CD-3 zeta of T-cell surface glycoprotein CD3 zeta chain OS=Mus musculus GN=CD247        | 508                   | 8.00E-47       | 18780        | 23              | 1            | 1            | REVDLTK          | REVDLTK          |
| tr E9Q357 E9Q357_MOUSE  | Uncharacterized protein OS=Mus musculus GN=Hd3p                                                  | 489                   | 7.00E-45       | 35358        | 33              | 1            | 1            | AQIDNLR          | AQIDNLR          |
| tr E9Q320 E9Q320_MOUSE  | Uncharacterized protein OS=Mus musculus GN=4732456N10R[K] [RIKEN cDNA 4732456N10 gene]           | 446                   | 1.30E-40       | 58587        | 33              | 1            | 1            | FAFDIK           | FAFDIK           |
| tr E9Q386 E9Q386_MOUSE  | Uncharacterized protein OS=Mus musculus GN=CD3g                                                  | 336                   | 1.30E-29       | 20725        | 16              | 1            | 1            | NLVGVDSR         | NLVGVDSR         |
| sp P04231 C030_MOUSE    | T-cell surface glycoprotein CD3 delta chain OS=Mus musculus GN=CD3d                              | 220                   | 5.40E-18       | 19305        | 13              | 1            | 1            | LGDNWPR          | LGDNWPR          |
| tr A0N813 A0N813_MOUSE  | T-cell receptor chain (Fragment) OS=Mus musculus GN=Trbc2                                        | 131                   | 4.30E-09       | 32088        | 11              | 1            | 1            | VSLEFSK          | VSLEFSK          |
| sp P22461 CODE_MOUSE    | T-cell surface glycoprotein CD3 epsilon chain OS=Mus musculus GN=CD3e                            | 131                   | 4.60E-09       | 21779        | 13              | 1            | 1            | DVSGLNDR         | DVSGLNDR         |
| tr A2NTU7 A2NTU7_MOUSE  | Cytotoxic T-cell receptor OS=Mus musculus GN=Trac                                                | 124                   | 2.10E-08       | 30063        | 8               | 1            | 1            | TMSEGFIDK        | TMSEGFIDK        |
| tr A2NTV6 A2NTV6_MOUSE  | Beta-chain (Fragment) OS=Mus musculus                                                            | 107                   | 1.00E-06       | 15916        | 8               | 1            | 1            | GDIPGGK          | GDIPGGK          |
| tr E9Q400 E9Q400_MOUSE  | Uncharacterized protein OS=Mus musculus GN=281062205R[K]                                         | 71                    | 0.0046         | 22277        | 5               | 1            | 1            | TTTENVSQTSNVK    | TTTENVSQTSNVK    |
| tr B2R0C3 B2R0C3_MOUSE  | Tyrosine-protein kinase receptor OS=Mus musculus GN=Harr                                         | 63                    | 0.03           | 147291       | 5               | 1            | 1            | SEVTEEA          | SEVTEEA          |
| sp Q92288 HSA1_MOUSE    | <b>RasGAP-activating-like protein 1 OS=Mus musculus GN=Raal1</b>                                 | 61                    | 0.03           | 90285        | 4               | 1            | 1            | EAQGTSPAR        | EAQGTSPAR        |
| sp A2A400 DHX8_MOUSE    | ATP-dependent RNA helicase DHX8 OS=Mus musculus GN=Dhx8                                          | 57                    | 0.11           | 143337       | 3               | 1            | 1            | VAAASVAK         | VAAASVAK         |
| tr A2M266 A2M266_MOUSE  | CD3 zeta OS=Mus musculus GN=CD247                                                                | 56                    | 0.14           | 21549        | 2               | 1            | 1            | NPGEGVYVALOK     | NPGEGVYVALOK     |
| tr D324W5 D324W5_MOUSE  | Uncharacterized protein OS=Mus musculus GN=I200074P13R[K]                                        | 49                    | 0.75           | 20422        | 6               | 1            | 1            | NDLMLK           | NDLMLK           |
| tr D324W5 D324W5_MOUSE  | Uncharacterized protein OS=Mus musculus GN=I200074P13R[K]                                        | 47                    | 1.1            | 20422        | 6               | 1            | 1            | NDLMLK           | NDLMLK           |
| tr E9QL28 E9QL28_MOUSE  | Uncharacterized protein OS=Mus musculus GN=Igf1n1                                                | 47                    | 1.1            | 140949       | 3               | 1            | 1            | LTVIEDLR         | LTVIEDLR         |
| tr D9CFN9 D9CFN9_MOUSE  | RIKEN cDNA 2210010C04, Isolform CRA, b OS=Mus musculus GN=2210010C04R[K]                         | 46                    | 1.4            | 27089        | 1               | 1            | 1            | VYVNWICQTIAAN    | VYVNWICQTIAAN    |
| tr D3YX85 D3YX85_MOUSE  | Uncharacterized protein OS=Mus musculus GN=6539001G17R[K]                                        | 43                    | 2.6            | 107593       | 3               | 1            | 1            | EISEVQR          | EISEVQR          |
| EXPERIMENT 2            |                                                                                                  |                       |                |              |                 |              |              |                  |                  |
| Protein Accession       | Protein Description                                                                              | Protein Masscot Score | Protein Expect | Protein Mass | Protein Matches | Protein Rank | Peptide Rank | Peptide sequence | Peptide sequence |
| sp A2AFR3-1 FRPD4_MOUSE | Isolform 1 of FERM and PDZ domain-containing protein 4 OS=Mus musculus GN=Frmpd4                 | 44                    | 2.3            | 146084       | 3               | 1            | 1            | KADESPR          | KADESPR          |
| sp P01739 TV42_MOUSE    | T-cell receptor alpha chain V region 2B4 OS=Mus musculus                                         | 146                   | 1.30E-10       | 14773        | 9               | 1            | 1            | ALMSFVNGEK       | ALMSFVNGEK       |
| sp P04231 C030_MOUSE    | T-cell surface glycoprotein CD3 delta chain OS=Mus musculus GN=CD3d                              | 288                   | 8.60E-25       | 19305        | 25              | 1            | 1            | LGDNWPR          | LGDNWPR          |
| sp P10126 EFT1A1_MOUSE  | Elongation factor 1-alpha 1 OS=Mus musculus GN=Eft1a1                                            | 88                    | 0.0081         | 50424        | 5               | 1            | 1            | LRLDVYK          | LRLDVYK          |
| sp P17897 LVZ1_MOUSE    | Lysozyme C-1 OS=Mus musculus GN=Lvz1                                                             | 53                    | 0.29           | 17240        | 1               | 1            | 1            | STDVGFQISR       | STDVGFQISR       |
| sp P20203 GPR78_MOUSE   | 78 kDa glucose-regulated protein OS=Mus musculus GN=Hsp95                                        | 508                   | 8.30E-47       | 72492        | 22              | 2            | 2            | VLESDLK          | VLESDLK          |
| sp P22461 CODE_MOUSE    | T-cell surface glycoprotein CD3 epsilon chain OS=Mus musculus GN=CD3e                            | 460                   | 6.10E-42       | 21779        | 67              | 1            | 1            | GTFGASPPR        | GTFGASPPR        |
| sp P24161-1 CD92_MOUSE  | Isolform CD-3 zeta of T-cell surface glycoprotein CD3 zeta chain OS=Mus musculus GN=CD247        | 652                   | 3.00E-61       | 18780        | 110             | 1            | 1            | ADDPENGGK        | ADDPENGGK        |
| sp P62697 CYC_MOUSE     | Cyclothrome c, somatic OS=Mus musculus GN=Cy3                                                    | 47                    | 1.1            | 11712        | 3               | 1            | 1            | ADLAATK          | ADLAATK          |
| sp P63017 HSP70_MOUSE   | Heat shock cognate 71 kDa protein OS=Mus musculus GN=Hsp98                                       | 500                   | 5.10E-46       | 71055        | 23              | 1            | 1            | NTITPTK          | NTITPTK          |
| sp Q5F2E7-1 NUFP2_MOUSE | Isolform 1 of Nuclear fragile X mental retardation-interacting protein 2 OS=Mus musculus GN=N715 | 41                    | 1.60E-67       | 75668        | 27              | 1            | 1            | SEGTDAVDK        | SEGTDAVDK        |
| sp Q61171 PBRX2_MOUSE   | Peroviradoin-2 OS=Mus musculus GN=Pbrx2                                                          | 187                   | 4              | 21936        | 3               | 1            | 1            | QITVDLPIGR       | QITVDLPIGR       |
| sp Q91V65 DDX1_MOUSE    | ATP-dependent RNA helicase DDX1 OS=Mus musculus GN=DDX1                                          | 62                    | 1.10E-14       | 83474        | 12              | 1            | 1            | VPVDFEDGK        | VPVDFEDGK        |
| sp Q91F41 RTCA_MOUSE    | RNA-splicing ligase RtcB homolog OS=Mus musculus GN=D10W54.52e                                   | 44                    | 0.032          | 55727        | 3               | 1            | 1            | TALDESVDVPAK     | TALDESVDVPAK     |
| sp Q9G048 NUDC2_MOUSE   | Nucl domain-containing protein 2 OS=Mus musculus GN=Nuclcd2                                      | 103                   | 2.1            | 17820        | 2               | 1            | 1            | MSAPFERE         | MSAPFERE         |
| sp Q9G042 F195A_MOUSE   | Protein FAM195A OS=Mus musculus GN=Fam195a                                                       | 103                   | 2.90E-06       | 17974        | 5               | 1            | 1            | TGPTPOODFSR      | TGPTPOODFSR      |
| sp Q92288 HSA1_MOUSE    | <b>RasGAP-activating-like protein 1 OS=Mus musculus GN=Raal1</b>                                 | 40                    | 0.03           | 90285        | 4               | 1            | 1            | BDLAAPRDSIGTS    | BDLAAPRDSIGTS    |
| tr A0N813 A0N813_MOUSE  | T-cell receptor chain (Fragment) OS=Mus musculus GN=Trbc2                                        | 55                    | 0.19           | 32088        | 3               | 1            | 1            | EYHSYGTDPQATYK   | EYHSYGTDPQATYK   |
| tr A2A420 A2A420_MOUSE  | Dystropin, muscular dystrophy OS=Mus musculus GN=Dmd                                             | 52                    | 0.35           | 427676       | 3               | 1            | 1            | ERIKK            | ERIKK            |
| tr A2A163 A2A163_MOUSE  | Hephaestin OS=Mus musculus GN=Hsth                                                               | 49                    | 2.8            | 130956       | 3               | 1            | 1            | GLTVQGGSR        | GLTVQGGSR        |

\* protein hits from control samples (TCR deficient 3A9 T cells) and common contaminants have been excluded.  
 \* a representative peptide from each hit is shown

SFigure 2: Rasal1 peptides are detected by TCR complex by tandem affinity purification (TAP) and MS/MS analysis. Peptides detected by MS/MS from 2 separate experiments.

SFigure 3

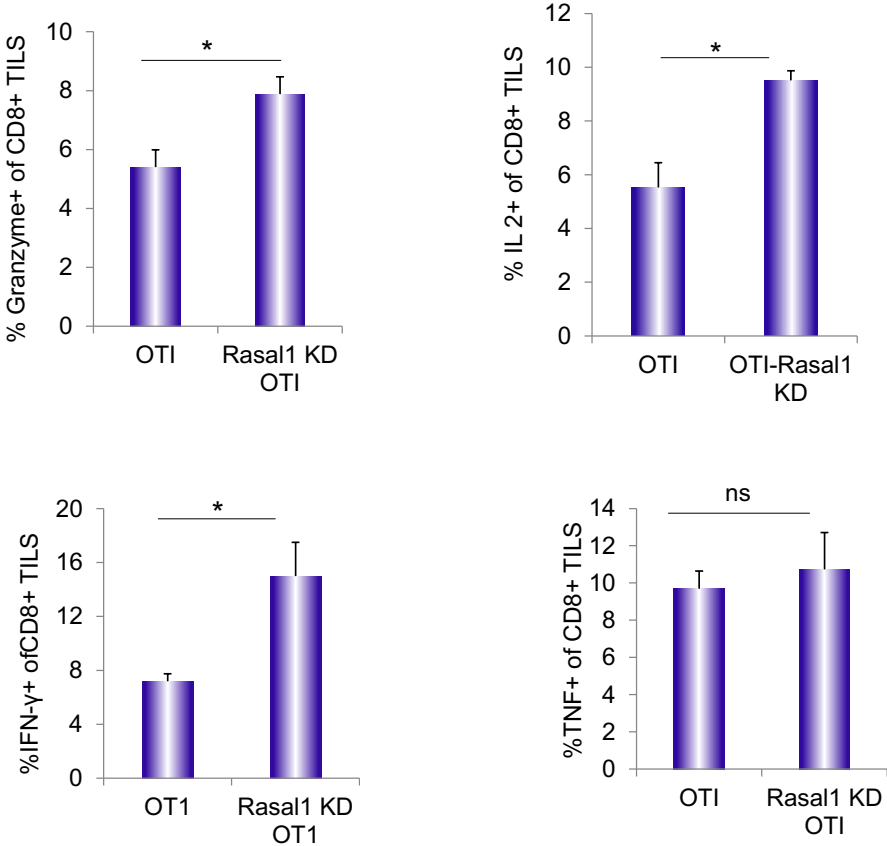

**SFigure 3:** MFI expression values for granzyme B and cytokines on scrambled siRNA or Rasal1 KD siRNA T-cells. Histogram showing the % of CD8 TILs expressing granzyme, Interleukin 2, IFN- $\gamma$ 1 and TNF $\alpha$ . T-cells were transfected with scrambled siRNA or Rasal1 KD siRNA T-cells followed by removal of TILs from EL4 tumors as described in the text.

Fig. 1B

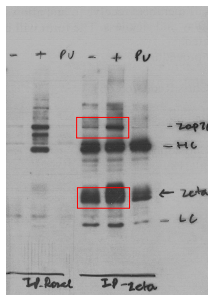

Fig. 1D

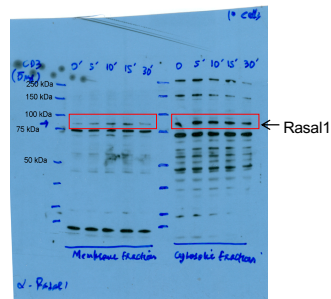

Fig. 2B

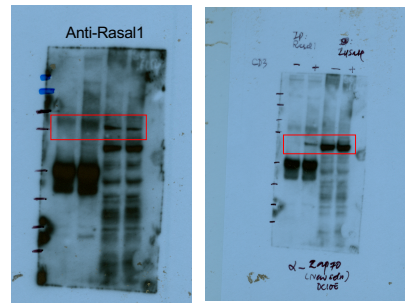

Fig. 2C

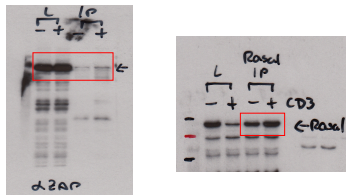

**Figure 4:** Uncropped versions of Figures 1-2





Fig. 4A (top)

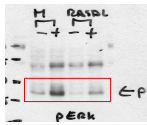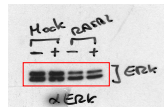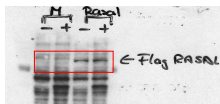

Fig. 4A (bottom)

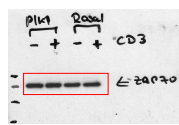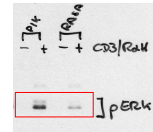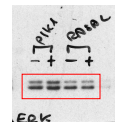

Fig. 4A inset

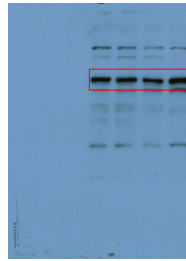

Fig. 4C

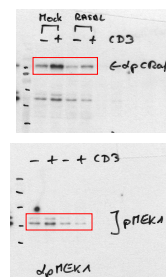

Fig. 5A uncropped

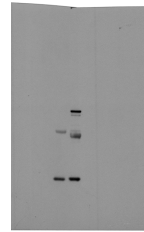

Fig. 5D uncropped

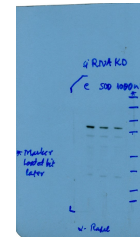

**SFigure 4:** Uncropped versions of figures 4-5
